# Supplementary material for: Encapsulation of [bmim+][Tf2N−] in different ZIF-8 metal analogues and evaluation of their CO2 selectivity over CH4 and N2 using molecular simulation
Source: Royal Society of Chemistry journal article supplement (doi:10.1039/d0me00021c), 2020-01-01
Supplement: d0me00021c1.pdf [file d0me00021c1.pdf]

# Encapsulation of [bmim<sup>+</sup>][Tf<sub>2</sub>N<sup>-</sup>] in different ZIF-8 metal analogues and evaluation of their CO<sub>2</sub> selectivity over CH<sub>4</sub> and N<sub>2</sub> using molecular simulation

Amro M. O. Mohamed<sup>†</sup>, Panagiotis Krokidas<sup>‡</sup> and Ioannis G. Economou<sup>\*</sup>

Chemical Engineering Program, Texas A&M University at Qatar, P.O. Box 23874, Education City, Doha, Qatar

<sup>†</sup>Current address: Division of Sustainable Development, Hamad Bin Khalifa University, Education City, Doha, Qatar

<sup>‡</sup>Current address: National Center for Scientific Research “Demokritos”, Institute of Nanoscience and Nanotechnology, Molecular Thermodynamics and Modelling of Materials Laboratory, GR – 153 10, Aghia Paraskevi Attikis, Greece

<sup>\*</sup>Corresponding author at: [ioannis.economou@qatar.tamu.edu](mailto:ioannis.economou@qatar.tamu.edu).

## Supplementary Information

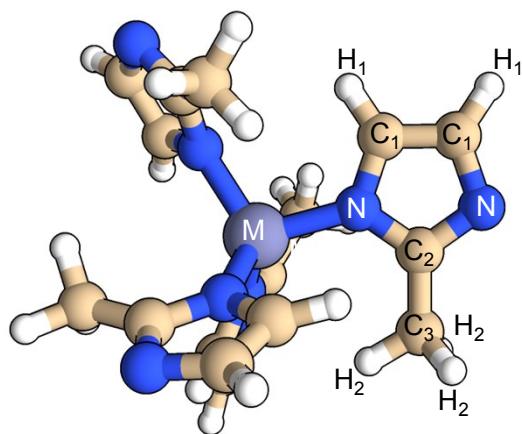

**Table S-1.** LJ parameters for the original ZIF-8 and its metal analogues (common values for all cases)

| Site | $\sigma$ (Å) | $\epsilon/k_B$ (K) |
|------|--------------|--------------------|
| M    | 1.96         | 6.290              |
| N    | 3.25         | 85.548             |
| H1   | 2.51         | 7.548              |
| H2   | 2.65         | 7.900              |
| C1   | 3.40         | 43.772             |
| C2   | 3.40         | 43.277             |
| C3   | 3.40         | 55.053             |

**Table S-2.** Coulombic parameters for the original ZIF-8 and its metal analogues

| Atom type | Partial charge (e) |         |         |         |
|-----------|--------------------|---------|---------|---------|
|           | CdIF-1             | ZIF-8   | ZIF-67  | BeIF-1  |
| M*        | 1.1901             | 1.3429  | 1.3497  | 1.6627  |
| N         | -0.6532            | -0.6822 | -0.6956 | -0.6646 |
| C1        | -0.0583            | -0.0622 | -0.0581 | -0.0896 |
| C2        | 0.7379             | 0.7551  | 0.7846  | 0.6287  |
| H1        | 0.095              | 0.0912  | 0.0910  | 0.0875  |
| C3        | -0.2771            | -0.2697 | -0.3094 | -0.1824 |
| H2        | 0.059              | 0.0499  | 0.0584  | 0.0186  |

\*M: metal center which is Cd, Zn, Co and Be for CdIF-1, ZIF-8, ZIF-67 and BeIF-1, respectively.

## Force field parameters for the Ionic liquid (IL)

### 1-Butyl-3 methylimidazolium bis(trifluoromethanesulfonyl) Imide ([bmim<sup>+</sup>][Tf<sub>2</sub>N<sup>-</sup>])

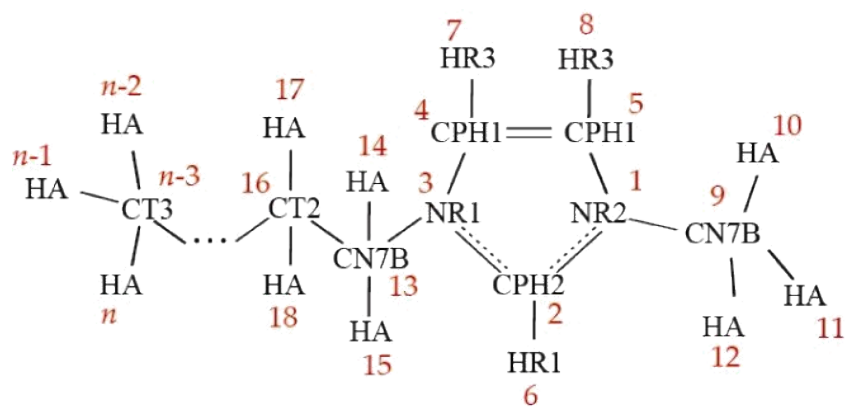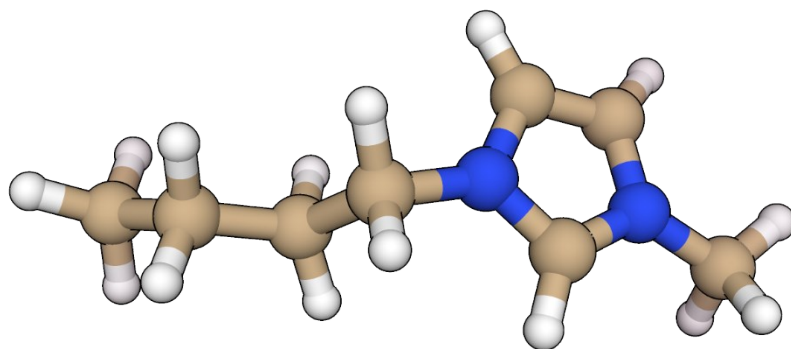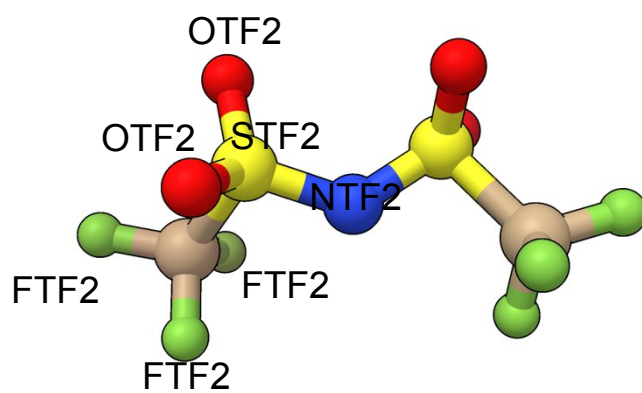

**Table S-3.** Partial charges and LJ parameters for [bmim<sup>+</sup>]

| Atom | Partial Charge q (e) | $\sigma$ ( $\text{\AA}$ ) | $\epsilon/k_B$ (K) |
|------|----------------------|---------------------------|--------------------|
| NR1  | 0.146046             | 3.296                     | 100.644            |
| CPH1 | -0.006432            | 3.207                     | 25.161             |
| NR2  | 0.092254             | 3.296                     | 100.644            |
| CPH2 | -0.193107            | 3.207                     | 25.161             |
| CPH2 | -0.152475            | 3.207                     | 25.161             |
| HR1  | 0.208287             | 1.604                     | 23.148             |
| HR2  | 0.205544             | 2.616                     | 3.925              |
| HR3  | 0.184183             | 2.616                     | 3.925              |
| CN7B | -0.171877            | 4.054                     | 10.064             |
| HA   | 0.119267             | 2.352                     | 11.071             |
| HA   | 0.148216             | 2.352                     | 11.071             |
| HA   | 0.087322             | 2.352                     | 11.071             |
| CN7B | 0.005903             | 4.054                     | 10.064             |
| HA   | 0.054165             | 2.352                     | 11.071             |
| HA   | 0.045561             | 2.352                     | 11.071             |
| CT2  | 0.076942             | 3.875                     | 27.677             |
| HA   | -0.029155            | 2.352                     | 11.071             |
| HA   | 0.000652             | 2.352                     | 11.071             |
| CT2  | 0.227458             | 3.875                     | 27.677             |
| HA   | -0.024423            | 2.352                     | 11.071             |
| HA   | -0.051806            | 2.352                     | 11.071             |
| CT3  | -0.261600            | 3.671                     | 40.258             |
| HA   | 0.061505             | 2.352                     | 11.071             |
| HA   | 0.051733             | 2.352                     | 11.071             |
| HA   | 0.136136             | 2.352                     | 11.071             |

**Table S-4.** Partial charges and LJ parameters for [Tf<sub>2</sub>N<sup>-</sup>]

| Atom | Partial Charge q (e) | $\sigma$ (Å) | $\epsilon/k_B$ (K) |
|------|----------------------|--------------|--------------------|
| CTF2 | 0.348789             | 3.499        | 33.212             |
| FTF2 | -0.131010            | 2.951        | 26.671             |
| STF2 | 0.858581             | 3.549        | 125.805            |
| OTF2 | -0.534882            | 2.960        | 105.676            |
| NTF2 | -0.449451            | 3.250        | 85.547             |

**Table S-5.** Bond stretching potential parameters for [bmim<sup>+</sup>]

$$u(l) = \frac{k_l}{2}(l - l_o)^2$$

| Atom 1 | Atom 2 | $k_l$ (kcal mol <sup>-1</sup> Å <sup>-2</sup> ) | $l_o$ (Å) |
|--------|--------|-------------------------------------------------|-----------|
| CN7B   | NR1    | 220.00                                          | 1.4762    |
| CN7B   | NR2    | 220.00                                          | 1.4762    |
| CPH1   | NR1    | 400.00                                          | 1.3819    |
| CPH1   | NR2    | 400.00                                          | 1.3819    |
| CPH2   | NR1    | 400.00                                          | 1.3366    |
| CPH2   | NR2    | 400.00                                          | 1.3366    |
| CPH1   | CPH1   | 410.00                                          | 1.3610    |
| CPH2   | HR1    | 340.00                                          | 1.0779    |
| CPH1   | HR3    | 365.00                                          | 1.0775    |
| CN7B   | HA     | 309.00                                          | 1.0889    |
| CT2    | HA     | 309.00                                          | 1.0954    |
| CT3    | HA     | 322.00                                          | 1.0935    |
| CN7B   | CT2    | 200.00                                          | 1.5308    |
| CT2    | CT2    | 222.50                                          | 1.5373    |
| CT2    | CT3    | 222.50                                          | 1.5314    |

|     |      |        |        |
|-----|------|--------|--------|
| CT1 | CN7B | 200.00 | 1.5240 |
| CT1 | HA   | 322.00 | 1.0893 |

**Table S-6.** Angle bending potential parameters for [bmim<sup>+</sup>]

$$u(\theta) = \frac{k_{\theta}}{2}(\theta - \theta_0)^2$$

| Atom 1 | Atom 2 | Atom 3 | $k_{\theta}$ (kcal mol <sup>-1</sup> rad <sup>-2</sup> ) | $\theta_0$ (degrees) |
|--------|--------|--------|----------------------------------------------------------|----------------------|
| CT2    | CN7B   | NR1    | 140.00                                                   | 112.34               |
| CPH1   | NR1    | CPH2   | 130.00                                                   | 108.25               |
| CPH1   | NR2    | CPH2   | 130.00                                                   | 108.25               |
| HA     | CN7B   | NR1    | 30.00                                                    | 109.41               |
| HA     | CN7B   | NR2    | 30.00                                                    | 109.41               |
| HR1    | CPH2   | NR1    | 25.00                                                    | 125.44               |
| HR1    | CPH2   | NR2    | 25.00                                                    | 125.44               |
| NR1    | CPH1   | CPH1   | 130.00                                                   | 107.28               |
| NR2    | CPH1   | CPH1   | 130.00                                                   | 107.28               |
| NR1    | CPH2   | NR2    | 130.00                                                   | 109.11               |
| HR3    | CPH1   | CPH1   | 25.00                                                    | 130.74               |
| NR2    | CPH1   | HR3    | 25.00                                                    | 122.04               |
| NR1    | CPH1   | HR3    | 25.00                                                    | 122.04               |
| HA     | CN7B   | HA     | 35.50                                                    | 108.44               |
| HA     | CN7B   | CT2    | 33.40                                                    | 111.68               |
| HA     | CT2    | CN7B   | 33.40                                                    | 109.13               |
| CN7B   | CT2    | CT2    | 58.35                                                    | 111.50               |
| CT2    | CT2    | CT3    | 58.00                                                    | 112.34               |
| CT2    | CT2    | CT2    | 58.00                                                    | 112.34               |
| HA     | CT2    | HA     | 35.50                                                    | 106.13               |

|      |      |      |        |        |
|------|------|------|--------|--------|
| HA   | CT3  | HA   | 35.50  | 107.24 |
| CT2  | CT2  | HA   | 26.50  | 108.43 |
| CT2  | CT3  | HA   | 34.60  | 111.62 |
| CT3  | CT2  | HA   | 34.60  | 109.47 |
| CN7B | NR2  | CPH2 | 130.00 | 125.75 |
| CN7B | NR1  | CPH2 | 130.00 | 125.75 |
| CN7B | NR2  | CPH1 | 130.00 | 125.67 |
| CN7B | NR1  | CPH1 | 130.00 | 125.67 |
| HA   | CT1  | HA   | 35.50  | 108.27 |
| HA   | CT1  | CN7B | 33.40  | 110.64 |
| HA   | CN7B | CT1  | 33.40  | 111.58 |
| NR1  | CN7B | CT1  | 140.00 | 112.31 |

**Table S-7.** Torsional potential parameters for [bmim<sup>+</sup>]

$$u(\chi) = k_{\chi}[1 + \cos(m\chi - \delta)]$$

| Atom 1 | Atom 2 | Atom 3 | Atom 4 | $k_{\chi}$ (kcal mol <sup>-1</sup> ) | $m$ | $\delta$ (deg) |
|--------|--------|--------|--------|--------------------------------------|-----|----------------|
| CPH2   | NR1    | CPH1   | CPH1   | 14.000                               | 2   | 180            |
| CPH2   | NR2    | CPH1   | CPH1   | 14.000                               | 2   | 180            |
| NR1    | CPH1   | CPH1   | NR2    | 14.000                               | 2   | 180            |
| NR1    | CPH2   | NR2    | CPH1   | 14.000                               | 2   | 180            |
| NR2    | CPH2   | NR1    | CPH1   | 14.000                               | 2   | 180            |
| HR1    | CPH2   | NR1    | CPH1   | 3.000                                | 2   | 180            |
| HR1    | CPH2   | NR2    | CPH1   | 3.000                                | 2   | 180            |
| HR3    | CPH1   | CPH1   | HR3    | 2.000                                | 2   | 180            |
| CPH1   | CPH1   | NR1    | CN7B   | 0.000                                | 1   | 0              |
| CPH1   | CPH1   | NR2    | CN7B   | 0.000                                | 1   | 0              |

|      |      |      |      |       |   |     |
|------|------|------|------|-------|---|-----|
| HR3  | CPH1 | NR2  | CPH2 | 3.000 | 2 | 180 |
| HR3  | CPH1 | NR1  | CPH2 | 3.000 | 2 | 180 |
| NR1  | CPH1 | CPH1 | HR3  | 3.000 | 2 | 180 |
| NR2  | CPH1 | CPH1 | HR3  | 3.000 | 2 | 180 |
| NR1  | CPH2 | NR2  | CN7B | 0.000 | 2 | 180 |
| NR2  | CPH2 | NR1  | CN7B | 0.000 | 2 | 180 |
| HR1  | CPH2 | NR1  | CN7B | 0.000 | 2 | 180 |
| HR1  | CPH2 | NR2  | CN7B | 0.000 | 2 | 180 |
| HR3  | CPH1 | NR1  | CN7B | 0.000 | 2 | 180 |
| HR3  | CPH1 | NR2  | CN7B | 0.000 | 2 | 180 |
| CPH2 | NR1  | CN7B | HA   | 0.195 | 2 | 180 |
| CPH2 | NR2  | CN7B | HA   | 0.195 | 2 | 180 |
| CPH1 | NR2  | CN7B | HA   | 0.000 | 3 | 0   |
| CPH1 | NR1  | CN7B | HA   | 0.000 | 3 | 0   |
| CPH2 | NR1  | CN7B | CT2  | 0.100 | 3 | 180 |
| CPH1 | NR1  | CN7B | CT2  | 0.200 | 4 | 0   |
| NR1  | CN7B | CT2  | CT2  | 0.000 | 3 | 0   |
| HA   | CT2  | CT3  | HA   | 0.160 | 3 | 0   |
| CT2  | CT2  | CT3  | HA   | 0.160 | 3 | 0   |
| NR1  | CN7B | CT2  | HA   | 0.000 | 3 | 0   |
| CN7B | CT2  | CT2  | CT3  | 0.150 | 1 | 0   |
| HA   | CN7B | CT2  | HA   | 0.195 | 3 | 0   |
| CT2  | CT2  | CN7B | HA   | 0.195 | 3 | 0   |
| HA   | CT2  | CT2  | CN7B | 0.195 | 3 | 0   |
| HA   | CT2  | CT2  | HA   | 0.195 | 3 | 0   |
| HA   | CT2  | CT2  | CT3  | 0.195 | 3 | 0   |
| HA   | CT1  | CN7B | HA   | 0.195 | 3 | 0   |



|     |      |      |      |       |   |     |
|-----|------|------|------|-------|---|-----|
| HA  | CT1  | CN7B | NR1  | 0.000 | 3 | 0   |
| CT1 | CN7B | NR1  | CPH2 | 0.100 | 3 | 180 |
| CT1 | CN7B | NR1  | CPH1 | 0.200 | 4 | 0   |

**Table S-8.** Improper torsional potential parameters for [bmim<sup>+</sup>]

$$u(\psi) = k_{\psi}(\psi - \psi_0)^2$$

| Atom 1 | Atom 2 | Atom 3 | Atom 4 | $k_{\psi}$ (kcal mol <sup>-1</sup> rad <sup>-2</sup> ) | $\psi$ (degrees) |
|--------|--------|--------|--------|--------------------------------------------------------|------------------|
| CPH2   | NR1    | NR2    | HR1    | 0.5                                                    | 0                |
| NR1    | CPH1   | CPH2   | CN7B   | 0.6                                                    | 0                |
| NR2    | CPH1   | CPH2   | CN7B   | 0.6                                                    | 0                |
| CPH1   | CPH1   | NR2    | HR3    | 0.5                                                    | 0                |
| CPH1   | CPH1   | NR1    | HR3    | 0.5                                                    | 0                |

**Table S-9.** Bond stretching potential parameters for [Tf<sub>2</sub>N<sup>-</sup>]

$$u(l) = \frac{k_l}{2}(l - l_0)^2$$

| Atom 1 | Atom 2 | $k_l$ (kcal mol <sup>-1</sup> Å <sup>-2</sup> ) | $l_0$ (Å) |
|--------|--------|-------------------------------------------------|-----------|
| CTF2   | FTF2   | 441.80                                          | 1.3230    |
| CTF2   | STF2   | 235.42                                          | 1.8180    |
| STF2   | OTF2   | 637.07                                          | 1.4420    |
| NTF2   | STF2   | 372.01                                          | 1.5700    |

**Table S-10.** Angle bending potential parameters for [Tf<sub>2</sub>N<sup>-</sup>]

$$u(\theta) = \frac{k_{\theta}}{2}(\theta - \theta_0)^2$$

| Atom 1 | Atom 2 | Atom 3 | $k_{\theta}$ (kcal mol <sup>-1</sup> rad <sup>-2</sup> ) | $\theta_0$ (degrees) |
|--------|--------|--------|----------------------------------------------------------|----------------------|
| FTF2   | CTF2   | FTF2   | 93.33                                                    | 107.10               |
| STF2   | CTF2   | FTF2   | 82.93                                                    | 111.80               |
| CTF2   | STF2   | OTF2   | 103.97                                                   | 102.80               |
| OTF2   | STF2   | OTF2   | 115.80                                                   | 118.50               |
| OTF2   | STF2   | NTF2   | 94.51                                                    | 113.60               |
| CTF2   | STF2   | NTF2   | 97.51                                                    | 100.20               |
| STF2   | NTF2   | STF2   | 80.19                                                    | 125.60               |

**Table S-11.** Torsional potential parameters for [Tf<sub>2</sub>N<sup>-</sup>]

$$u(\chi) = k_{\chi}[1 + \cos(m\chi - \delta)]$$

| Atom 1 | Atom 2 | Atom 3 | Atom 4 | $k_{\chi}$ (kcal mol <sup>-1</sup> ) | $m$ | $\delta$ (degrees) |
|--------|--------|--------|--------|--------------------------------------|-----|--------------------|
| TF2    | CTF2   | STF2   | OTF2   | 0.1734                               | 3   | 0                  |
| STF2   | NTF2   | STF2   | OTF2   | -0.0018                              | 3   | 0                  |
| FTF2   | CTF2   | STF2   | NTF2   | 0.1580                               | 3   | 0                  |
| STF2   | NTF2   | STF2   | CTF2   | 7.8329                               | 1   | 0                  |
|        |        |        |        | -2.4904                              | 2   | 180                |
|        |        |        |        | -0.7636                              | 3   | 0                  |

## Force field parameters for gas molecules

**Table S-12.** LJ and Coulombic parameters for the gas molecules in the TraPPE Potential

$$u(r_{ij}) = 4\epsilon_{ij} \left[ \left( \frac{\sigma_{ij}}{r_{ij}} \right)^{12} - \left( \frac{\sigma_{ij}}{r_{ij}} \right)^6 \right] + \frac{1}{4\pi\epsilon_0} \frac{q_i q_j}{r_{ij}}$$

| Molecule                  | UA | Partial Charge q (e) | $\sigma$ (Å) | $\epsilon/k_B$ (K) |
|---------------------------|----|----------------------|--------------|--------------------|
| CO <sub>2</sub> (TraPPE)  | C  | +0.700               | 2.80         | 27.00              |
|                           | O  | -0.350               | 3.05         | 79.00              |
| N <sub>2</sub> (TraPPE)   | N  | -0.482               | 3.31         | 36.00              |
|                           | M  | +0.964               | 0.00         | 0.00               |
| CH <sub>4</sub> (OPLS-AA) | C  | -0.240               | 3.50         | 32.21              |
|                           | H  | 0.060                | 2.50         | 15.10              |

**Table S-13.** Bonds length and angle parameters in the TraPPE-UA potential

$$u(l) = \frac{k_l}{2}(l - l_0)^2$$

$$u(\theta) = \frac{k_\theta}{2}(\theta - \theta_0)^2$$

| Adsorbate       | Bond | $k_l$ (K) | $l_0$ (Å) | Angle | $k_\theta$ (K) | $\theta_0$<br>(degrees) |
|-----------------|------|-----------|-----------|-------|----------------|-------------------------|
| CO <sub>2</sub> | C-O  | rigid     | 1.16      | O-C-O | rigid          | 180.0                   |
| N <sub>2</sub>  | N-M  | rigid     | 0.55      | N-M-N | rigid          | 180.0                   |
| CH <sub>4</sub> | C-H  | 331       | 1.09      | H-C-H | 35             | 109.5                   |

**Table S-14.** Data values for Figure 3

| ZIF    | P (bar) | CO <sub>2</sub> loading<br>(mmol g <sup>-1</sup> ) | Statistical uncertainty<br>(mmol g <sup>-1</sup> ) |
|--------|---------|----------------------------------------------------|----------------------------------------------------|
| ZIF-67 | 0.06    | 0.070                                              | 0.001                                              |
|        | 0.23    | 0.249                                              | 0.005                                              |
|        | 0.51    | 0.57                                               | 0.01                                               |
|        | 1.14    | 1.35                                               | 0.01                                               |
|        | 2.57    | 3.170                                              | 0.002                                              |
|        | 5.87    | 6.03                                               | 0.02                                               |
|        | 13.59   | 8.03                                               | 0.05                                               |
|        | 33.82   | 8.86                                               | 0.01                                               |
| BeIF-1 | 0.06    | 0.33                                               | 0.04                                               |
|        | 0.23    | 1.11                                               | 0.01                                               |
|        | 0.51    | 2.58                                               | 0.01                                               |
|        | 1.14    | 4.92                                               | 0.02                                               |
|        | 2.57    | 6.97                                               | 0.02                                               |
|        | 5.87    | 8.37                                               | 0.03                                               |
|        | 13.59   | 9.22                                               | 0.06                                               |
|        | 33.82   | 9.50                                               | 0.03                                               |
| CdIF-1 | 0.06    | 0.036                                              | 0.001                                              |
|        | 0.23    | 0.116                                              | 0.002                                              |
|        | 0.51    | 0.28                                               | 0.01                                               |
|        | 1.14    | 0.629                                              | 0.002                                              |
|        | 2.57    | 1.52                                               | 0.01                                               |
|        | 5.87    | 3.85                                               | 0.03                                               |
|        | 13.59   | 7.35                                               | 0.01                                               |
|        | 33.82   | 8.92                                               | 0.07                                               |

**Table S-15.** Data values for Figure 4

| ZIF    | IL composition (wt%) | CO <sub>2</sub> loading (mmol g <sup>-1</sup> ) | Statistical uncertainty (mmol g <sup>-1</sup> ) |
|--------|----------------------|-------------------------------------------------|-------------------------------------------------|
| ZIF-8  | 0.00                 | 0.06                                            |                                                 |
|        | 0.02                 | 0.06                                            | 0.01                                            |
|        | 0.12                 | 0.11                                            | 0.01                                            |
|        | 0.21                 | 0.13                                            | 0.01                                            |
|        | 0.31                 | 0.13                                            | 0.02                                            |
|        | 0.32                 | 0.12                                            | 0.01                                            |
|        | 0.35                 | 0.08                                            | 0.03                                            |
|        | 0.38                 | 0.03                                            | 0.01                                            |
| CdIF-1 | 0.00                 | 0.037                                           | 0.001                                           |
|        | 0.11                 | 0.064                                           | 0.001                                           |
|        | 0.20                 | 0.078                                           | 0.002                                           |
|        | 0.29                 | 0.11                                            | 0.01                                            |
|        | 0.34                 | 0.10                                            | 0.01                                            |
|        | 0.38                 | 0.07                                            | 0.01                                            |
|        | 0.42                 | 0.03                                            | 0.01                                            |
|        | 0.43                 | 0.01                                            | 0.01                                            |
| BeIF-1 | 0.00                 | 0.33                                            | 0.04                                            |
|        | 0.17                 | 0.57                                            | 0.09                                            |
|        | 0.29                 | 0.49                                            | 0.05                                            |
|        | 0.34                 | 0.33                                            | 0.05                                            |
|        | 0.38                 | 0.11                                            | 0.03                                            |
| ZIF-67 | 0.00                 | 0.073                                           | 0.001                                           |
|        | 0.14                 | 0.13                                            | 0.02                                            |
|        | 0.24                 | 0.21                                            | 0.01                                            |
|        | 0.32                 | 0.15                                            | 0.04                                            |
|        | 0.40                 | 0.02                                            | 0.01                                            |

**Table S-16.** Data values for Figures 5 and 6

| ZIF    | IL composition<br>(wt%) | APV   | CO <sub>2</sub> /N <sub>2</sub><br>Selectivity | Statistical<br>uncertainty      | CO <sub>2</sub> /CH <sub>4</sub><br>Selectivity | Statistical<br>uncertainty       |
|--------|-------------------------|-------|------------------------------------------------|---------------------------------|-------------------------------------------------|----------------------------------|
|        |                         |       |                                                | CO <sub>2</sub> /N <sub>2</sub> |                                                 | CO <sub>2</sub> /CH <sub>4</sub> |
| CdIF-1 | 0.00                    | 1.00  | 8.86                                           | 3.13                            | 5.66                                            | 0.58                             |
|        | 0.11                    | 0.83  | 14.93                                          | 0.99                            | 12.83                                           | 0.30                             |
|        | 0.20                    | 0.64  | 23.21                                          | 3.05                            | 17.75                                           | 0.96                             |
|        | 0.29                    | 0.38  | 41.25                                          | 3.50                            | 28.70                                           | 2.17                             |
|        | 0.34                    | 0.28  | 59.66                                          | 0.57                            | 43.10                                           | 3.45                             |
|        | 0.38                    | 0.18  | 78.16                                          | 13.45                           | 46.13                                           | 8.01                             |
|        | 0.42                    | 0.087 | 95.16                                          | 21.17                           | 54.10                                           | 11.63                            |
|        | 0.43                    | 0.059 | 80.52                                          | 30.03                           | 43.83                                           | 16.53                            |
| BeIF-1 | 0.00                    | 1     | 17.98                                          | 3.33                            | 11.72                                           | 1.55                             |
|        | 0.17                    | 0.64  | 41.75                                          | 7.71                            | 24.34                                           | 3.91                             |
|        | 0.29                    | 0.26  | 73.79                                          | 15.49                           | 38.48                                           | 10.18                            |
|        | 0.34                    | 0.17  | 98.07                                          | 14.57                           | 54.69                                           | 11.59                            |
|        | 0.38                    | 0.073 | 118.68                                         | 25.24                           | 51.89                                           | 11.78                            |
| ZIF-67 | 0.00                    | 1     | 10.55                                          | 1.30                            | 7.99                                            | 0.53                             |
|        | 0.14                    | 0.76  | 20.17                                          | 3.47                            | 15.55                                           | 2.65                             |
|        | 0.24                    | 0.49  | 40.91                                          | 0.92                            | 28.37                                           | 1.80                             |
|        | 0.32                    | 0.25  | 60.88                                          | 5.88                            | 38.14                                           | 5.15                             |
|        | 0.40                    | 0.079 | 111.81                                         | 14.89                           | 45.94                                           | 11.03                            |
| ZIF-8  | 0.00                    | 1     | 9.30                                           |                                 | 7.40                                            |                                  |
|        | 0.02                    | 0.95  | 10.17                                          | 1.02                            | 8.11                                            | 0.57                             |
|        | 0.21                    | 0.46  | 26.46                                          | 2.65                            | 16.88                                           | 1.18                             |
|        | 0.31                    | 0.22  | 64.39                                          | 8.88                            | 39.81                                           | 3.75                             |
|        | 0.32                    | 0.18  | 76.27                                          | 10.23                           | 46.18                                           | 6.43                             |
|        | 0.38                    | 0.033 | 55.05                                          | 9.14                            | 29.29                                           | 11.73                            |

## Monte Carlo simulations details

In all simulations, a super-cell of eight ( $2 \times 2 \times 2$ ) unit cells was used. The pristine metal ZIF analogues were based on structural information that can be found in our previous work.<sup>3</sup>

### *Insertion of ILs (for the preparation of the various metal IL@ZIFs analogues)*

The IL@ZIF metal analogues were designed and built based on the individual pristine metal ZIF analogues, by inserting ILs, based on the methodology described in the main text and on the following Monte Carlo (MC) simulation details.

IL cations and ions are subject to:

- Translation, where they are selected at random with a uniform probability of  $1/N$ , where  $N$  is the total number of molecules, and they translate following uniform distribution on the interval of maximum displacement ( $\pm$  maximum displacement in Å). Depending on the selected IL composition and the ZIF metal analogue, the number of IL pairs can reach up to 48, that correspond to 96 ions in total.
- Rotation, where they are selected at random with a uniform probability of  $1/N$  and they rotate following uniform distribution on the interval of maximum rotation ( $\pm$  maximum rotation for species in degrees),
- Insertion, where they are selected at random with a uniform probability of  $1/N$ ,
- Deletion, where they are selected at random with a uniform probability of  $1/N$ ,
- Regrowth with configurational biased Monte Carlo (CBMC), where they are selected at random with a uniform probability of  $1/N$ . Then a bond is selected with uniform probability of  $1/N_{\text{bonds}}$ . Then the fragments on the one or the other side of the bond are deleted with equal probability. The deleted fragments are reinserted. For more details, one should refer to the Cassandra code's original publication<sup>1</sup> and manual.<sup>2</sup>

### *Sorption of CO<sub>2</sub>, CH<sub>4</sub> and N<sub>2</sub>*

During the sorption simulations the following moves apply:

- Translation, where IL or adsorbate species is selected at random based on the mole fraction of species. Then, a molecule from the selected species is selected with a uniform probability of  $1/N$ , where  $N$  is the total number of molecules of the selected species, and they translate following uniform distribution on the interval of maximum displacement ( $\pm$  maximum displacement in Å). Depending on the selected IL composition and the ZIF metal analogue, the number of IL pairs can reach up to 48, that correspond to 96 ions in total. Regarding the number of adsorbates, depending on the ZIF and IL@ZIF metal variant,  $N$  ranges between 1 – 6 for the lowest pressure (0.065 bar) and 172 – 265 for the highest pressure (33.8 bar),

- Rotation, where an IL or adsorbate species is selected at random based on the mole fraction of species. Then, a molecule from the selected species is selected with a uniform probability of  $1/N$  and they rotate following uniform distribution on the interval of maximum rotation ( $\pm$  maximum rotation for species in degrees),
- Insertion, which applies only to the adsorbates. An adsorbate molecule is selected with a uniform probability of  $1/N$ ,
- Deletion, which applies only to the adsorbates. An adsorbate molecule is selected with a uniform probability of  $1/N$ ,
- Regrowth, which applies only to the ILs. An IL anion or cation is selected with a uniform probability of  $1/N$ . Then a bond is selected with uniform probability of  $1/N_{\text{bonds}}$ . Then the fragments on the one or the other side of the bond are deleted with equal probability. The deleted fragments are reinserted. For more details, one should refer to the Cassandra code's original publication<sup>1</sup> and manual.<sup>2</sup>

Table S-17 summarizes the parameter and probability values for the two types of simulation (insertion of ILs and gas sorption).

**Table S-17.** MC simulation details for the insertion of ILs and sorption of various gases

| Move        |                       | Type of simulation                  |                          |                                                                    |
|-------------|-----------------------|-------------------------------------|--------------------------|--------------------------------------------------------------------|
|             |                       | Insertion of ILs<br>cation or anion | Sorption                 |                                                                    |
|             |                       |                                     | ILs<br>(cation or anion) | Adsorbate<br>(CO <sub>2</sub> , N <sub>2</sub> , CH <sub>4</sub> ) |
| Translation | Percentage            | 20                                  | 20                       | 20                                                                 |
|             | Max. displacement (Å) | 1.0                                 | 1.0                      | 2.0                                                                |
| Rotation    | Percentage            | 20                                  | 20                       | 20                                                                 |
|             | Max. rotations (deg.) | 10.0                                | 10.0                     | 180.0                                                              |
| Regrowth    | Percentage            | 10                                  | 20                       | -                                                                  |
| Insertion   | Percentage            | 25                                  | -                        | 20                                                                 |
| Deletion    | Percentage            | 25                                  | -                        | 20                                                                 |

For the insertion and adsorption runs with the configurational bias method of Cassandra code we used the following parameters (according to Cassandra code's nomenclature):

- Rcut\_cbmc 6.5 Å (cutoff for partially regrown molecule),
- Kapp\_ins 12 (equals the number of generated trial positions),
- Kappa\_dih 10 (equals the number of generated trial dihedral angles),
- Ewald summation method ( $10^{-5}$  accuracy) (12 Å),
- Lennard-Jones 12-6 potential (14 Å).



## Different configurations and convergence

Multiple configurations at each IL composition must be considered to ensure statistical accuracy. These configurations reflect the different initial conformations and distribution of the ILs in the ZIF cages, at a given IL composition. The desired number of IL molecules are inserted in the ZIF analogue under investigation, following the methodology described in the manuscript and in the section above with CBMC.

A simple factor is adopted to assess the deviation of the IL distribution in the cages from the uniform distribution:

$$\text{Deviation of ILs distribution from uniform distribution} = \sqrt{\frac{\sum_i^N (n_u - n_i)^2}{N}}$$

where  $n_u$  is the number of anion molecules in a given unit cell corresponding to a uniform distribution,  $n_i$  is the number of anion molecules in a given unit cell of the actual initial configuration and  $N$  is total the number of unit cells used in the simulation.

Then we estimate the average deviation from the uniform distribution for each composition, by averaging over all the different IL initial configurations. For a better understanding we plot average deviation values for selected IL composition points for every metal analogue.

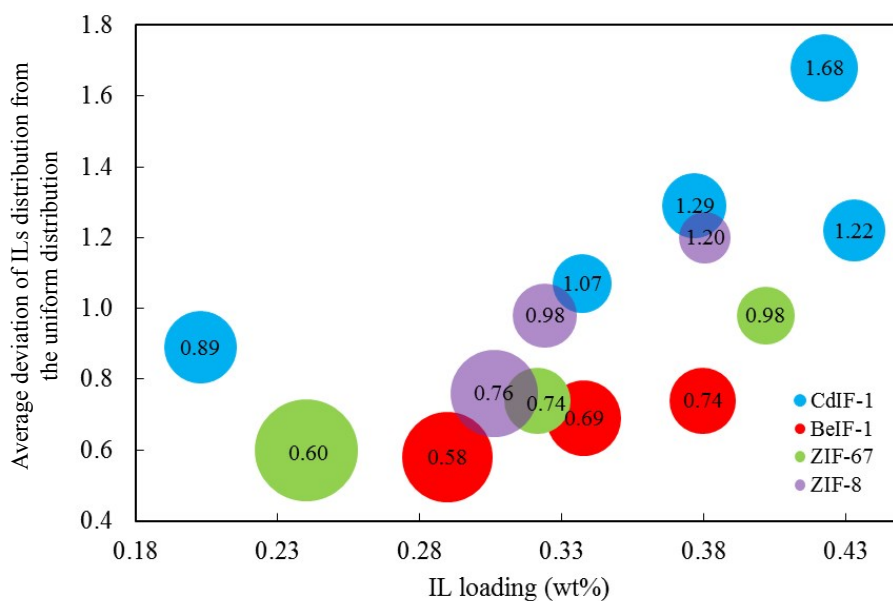

**Figure S-1.** Average deviation from uniform distribution for the distribution of ILs for various compositions points at each metal analogue.

The size of the circle corresponds to the coefficient of variance (CV), defined as:

$$CV = \frac{\sigma}{\text{average deviation from uniform distribution}}$$

Sampling more configurations in our calculations drives the CV to convergence as the following plot shows.

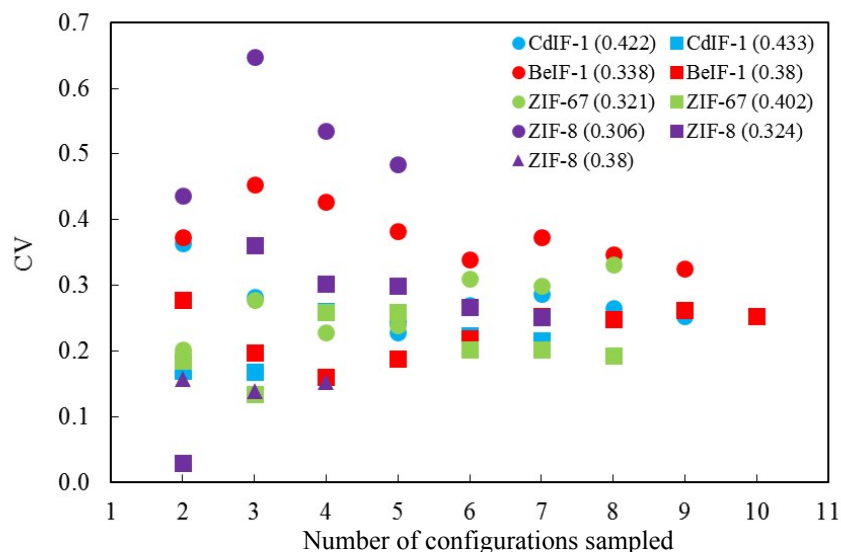

**Figure S-2.** CV as a function of number of IL configurations sampled in the calculations for two different compositions for every metal analogue.

For a better understanding of the effect that the number of configurations has on the estimated selectivity we have gathered results for two different IL compositions for each metal analogue. The selectivity of CO<sub>2</sub>/CH<sub>4</sub> and CO<sub>2</sub>/N<sub>2</sub> as a function of the number of configurations is shown in Figure S-3. It is clear that at least three configurations must be considered to reach good statistics, therefore we employed an additional number of configurations. This strategy was applied to all IL compositions.

Table S-18 summarizes the number of configurations employed in our calculations.

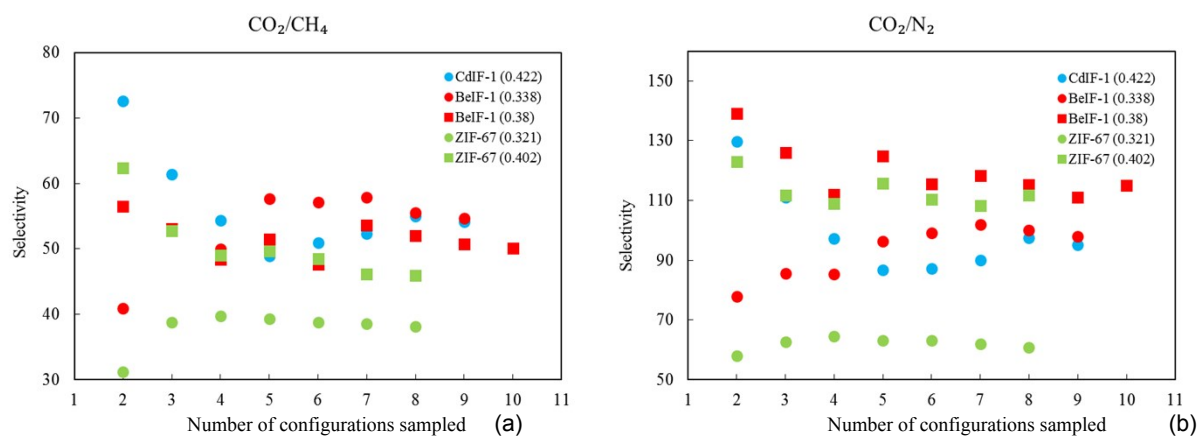

**Figure S-3.** Selectivity of (a) CO<sub>2</sub>/CH<sub>2</sub> and (b) CO<sub>2</sub>/N<sub>2</sub> as a function of the number of configurations considered in the simulations. In parenthesis for each metal analogue the IL composition is shown.

**Table S-18.** Number of configurations used to reach convergence in the sorption calculations for every metal IL@ZIF analogue and at a given IL composition

| Structure | IL loading wt% | Number of structures |
|-----------|----------------|----------------------|
| ZIF-67    | 0.14           | 3                    |
|           | 0.24           | 3                    |
|           | 0.32           | 8                    |
|           | 0.40           | 8                    |
| BeIF-1    | 0.17           | 3                    |
|           | 0.29           | 3                    |
|           | 0.34           | 9                    |
|           | 0.38           | 10                   |
|           | 0.11           | 3                    |
|           | 0.20           | 3                    |
|           | 0.29           | 3                    |
| CdIF-1    | 0.34           | 3                    |
|           | 0.38           | 3                    |
|           | 0.42           | 9                    |
|           | 0.43           | 5                    |
| ZIF-8     | 0.02           | 3                    |
|           | 0.21           | 3                    |
|           | 0.31           | 4                    |
|           | 0.32           | 7                    |
|           | 0.38           | 5                    |

## References

- (1) Shah, J. K.; Marin-Rimoldi, E.; Mullen, R. G.; Keene, B. P.; Khan, S.; Paluch, A. S.; Rai, N.; Romanielo, L. L.; Rosch, T. W.; Yoo, B.; Maginn, E. J. Cassandra: An Open Source Monte Carlo Package for Molecular Simulation. *J. Comput. Chem.* **2017**, *38*, 1727–1739.
- (2) Cassandra documentation <https://cassandra.nd.edu/index.php/documentation>.
- (3) Krokidas, P.; Moncho, S.; Castier, M.; Brothers, E. N.; Economou, I. G. Tailoring the Gas Separation Efficiency of Metal Organic Framework ZIF-8 through Metal Substitution: A Computational Study. *Phys. Chem. Chem. Phys.* **2018**, *20*, 4879–4892.
